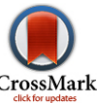

## Correction

# Correction: Quantification of Pancreatic Cancer Proteome and Phosphorylome: Indicates Molecular Events Likely Contributing to Cancer and Activity of Drug Targets

The *PLOS ONE* Staff

### Notice of Republication

This article was republished on August 11, 2014, to replace incorrectly changed characters in the byline and Competing Interests statement. The publisher apologizes for the errors. Please download this article again to view the correct version. The originally published, uncorrected article and the republished, corrected article are provided here for reference.

### Supporting Information

**File S1.** Originally published, uncorrected article.  
(PDF)

**File S2.** Republished, corrected article.  
(PDF)

### Reference

1. Britton D, Zen Y, Quaglia A, Selzer S, Mitra V, et al. (2014) Quantification of Pancreatic Cancer Proteome and Phosphorylome: Indicates Molecular Events Likely Contributing to Cancer and Activity of Drug Targets. *PLoS ONE* 9(3): e90948. doi:10.1371/journal.pone.0090948

**Citation:** The *PLOS ONE* Staff (2014) Correction: Quantification of Pancreatic Cancer Proteome and Phosphorylome: Indicates Molecular Events Likely Contributing to Cancer and Activity of Drug Targets. *PLoS ONE* 9(8): e107077. doi:10.1371/journal.pone.0107077

**Published:** August 25, 2014

**Copyright:** © 2014 The *PLOS ONE* Staff. This is an open-access article distributed under the terms of the Creative Commons Attribution License, which permits unrestricted use, distribution, and reproduction in any medium, provided the original author and source are credited.
